# Supplementary material for: Small chromosomal regions position themselves autonomously according to their chromatin class
Source: HighWire-hosted journal article supplement (doi:10.1101/gr.213751.116), 2017-03-24

**Supplemental\_Figure\_S3. Expression of mouse and human genes in tissues of mice carrying C- and L-HACs.**

Both human *ABCA4* and mouse *Abca4* genes are expressed in retina but not in liver. The *Cnn3/CNN3* genes are expressed in both analyzed tissues. As a control, expression of the mouse *Actb* gene was tested in parallel. Numbers on the left and right mark the length of the marker fragments (bp); *italic numbers* at the bottom show expected amplified fragment length (bp)

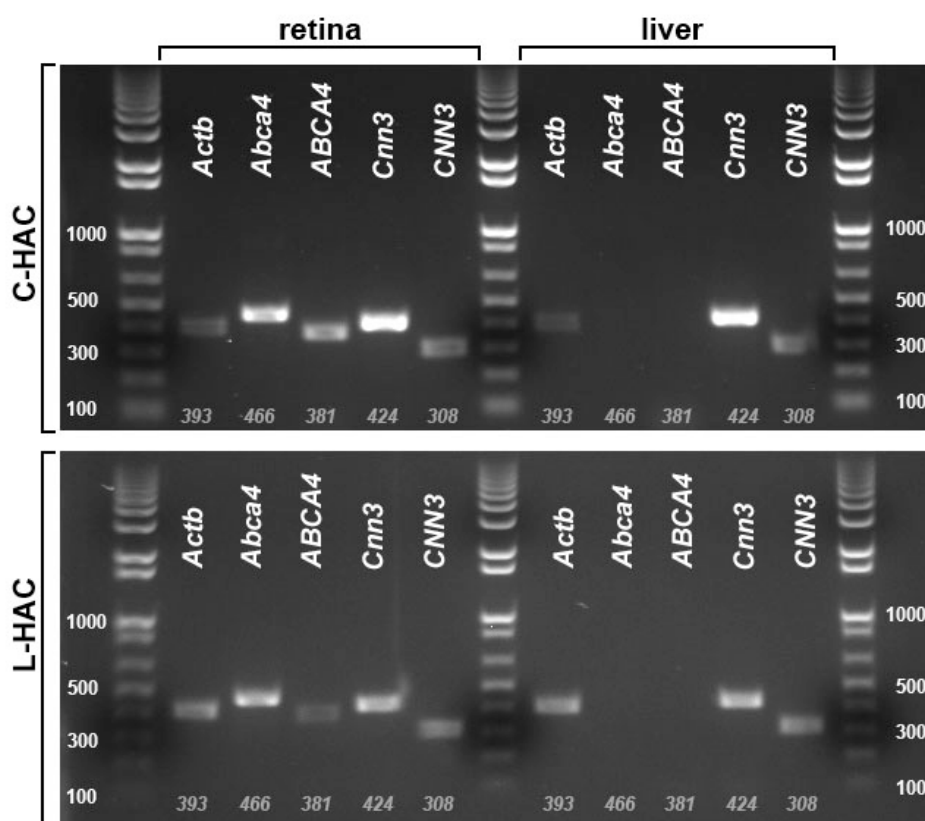

Supplement: Supplemental_Fig_S3.pdf [file Supplemental_Fig_S3.pdf]
