# Supplementary material for: Small chromosomal regions position themselves autonomously according to their chromatin class
Source: HighWire-hosted journal article supplement (doi:10.1101/gr.213751.116), 2017-03-24

**Supplemental\_Figure\_S5. Zoom-in of Figure 2 showing the structure and 4C-seq intra-chromosomal contact profiles of the *BCAR3* viewpoints.**

Tracks ordered from top to bottom are: genes, C- and L-HAC sequence blocks, 4C-seq contact profiles of the viewpoint within *BCAR3* gene. The gene-rich segments are highlighted in *green*; gene desert and gene-poor segments in *red* and *yellow*, respectively. Y-axis value is set to maximum of hundred. Note that BCAR3 viewpoint has contacts preferably within gene-rich segment and very little contacts with gene desert and gene-poor segments.

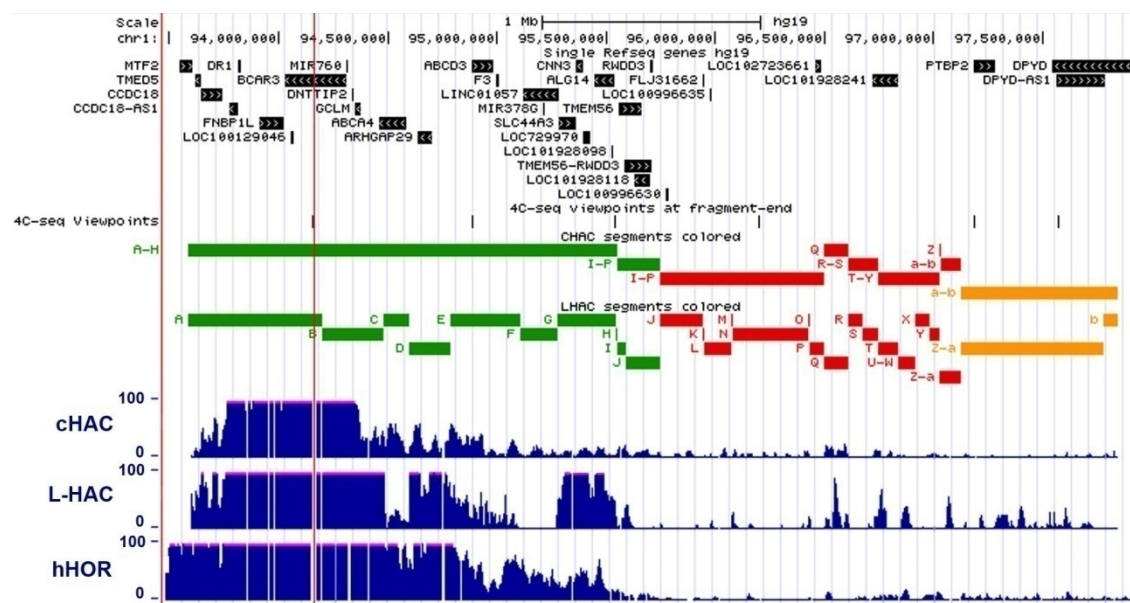

Supplement: Supplemental_Fig_S5.pdf [file Supplemental_Fig_S5.pdf]
