# Supplementary material for: Small chromosomal regions position themselves autonomously according to their chromatin class
Source: HighWire-hosted journal article supplement (doi:10.1101/gr.213751.116), 2017-03-24

**Supplemental\_Figure\_S6. Heat map of Spearman's rank correlation coefficients of the 4C-seq profiles in *cis* of mHOR.**

4C-seq data of mouse orthologous region (mHOR) from mouse fibroblasts carrying circular HAC (mHOR-C) and linear HAC (mHOR-L). The corresponding 4C-seq profiles are shown in Fig. 2B. 4C-seq data within 200 kb from each viewpoint were excluded. The colors range from anti-correlating (-0.7) blue to correlating red (0.7).

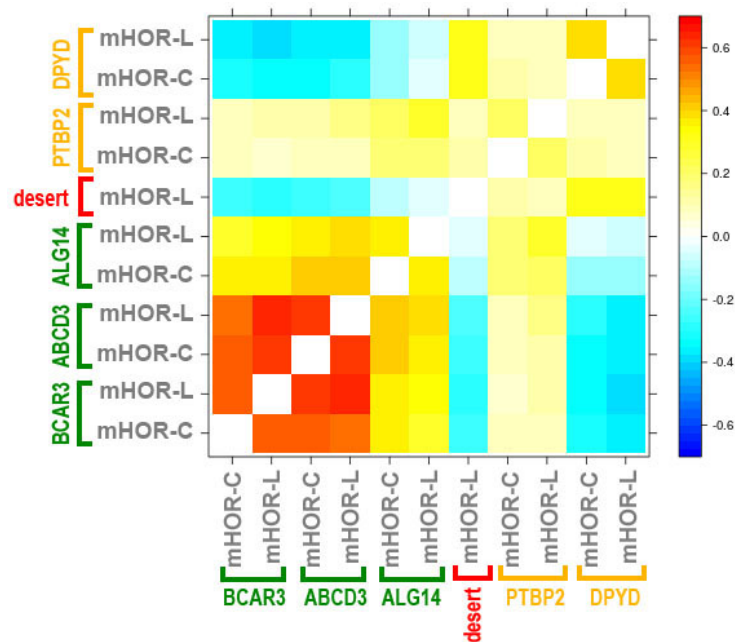

Supplement: Supplemental_Fig_S6.pdf [file Supplemental_Fig_S6.pdf]
