# Supplementary material for: Small chromosomal regions position themselves autonomously according to their chromatin class
Source: HighWire-hosted journal article supplement (doi:10.1101/gr.213751.116), 2017-03-24

**Supplemental\_Figure\_S7. Circos plots of *trans* 4C-seq interactions for the human and mouse orthology region (hHOR and mHOR) and the HACs.**

4C-seq viewpoint names are indicated in black in colored rectangles according to their chromatin segment; gene-poor, *yellow*; gene desert, *red*; gene-rich, *green*. 4C-seq interactions from the viewpoint to a *trans* chromosome are indicated with a line colored according to chromosome number. Note that the HAC chromosome is added to the mouse complement on the mHOR, the C-HAC, and L-HAC circularized ideograms.

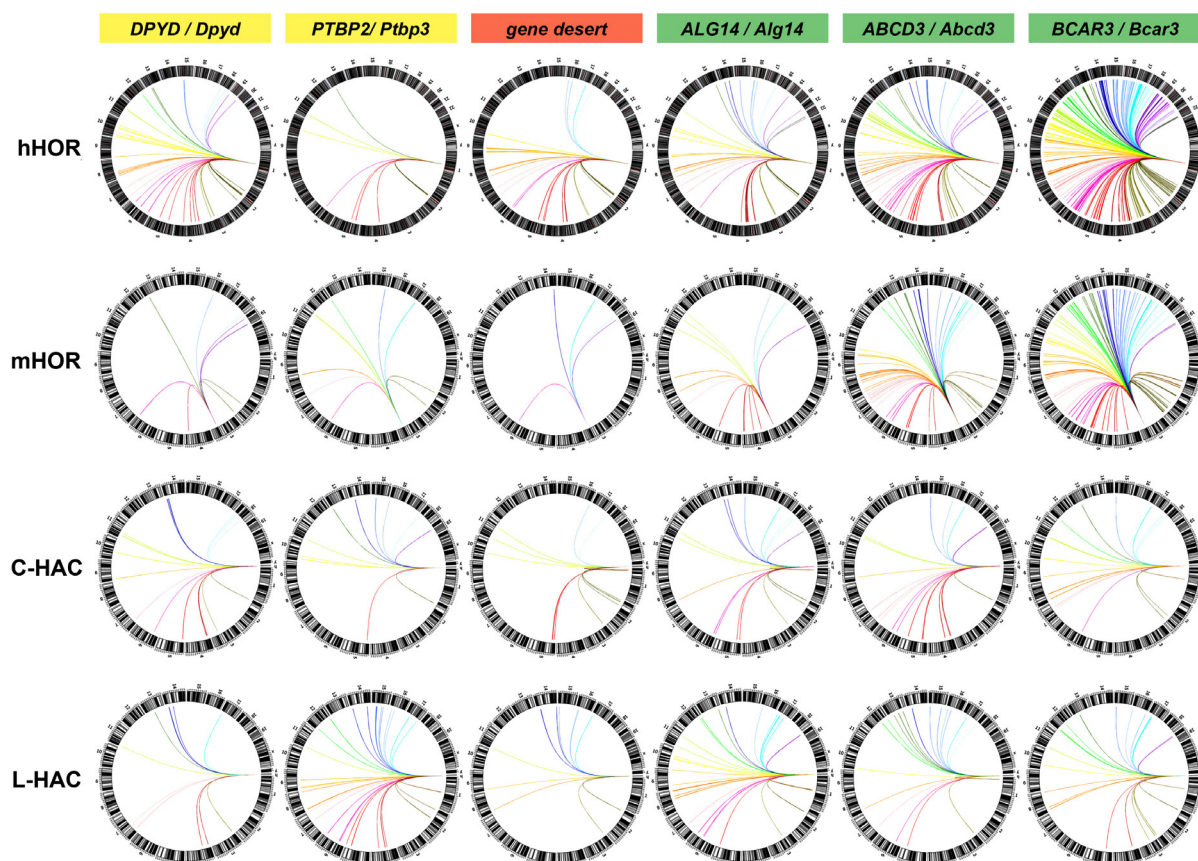

Supplement: Supplemental_Fig_S7.pdf [file Supplemental_Fig_S7.pdf]
