# Supplementary material for: Small chromosomal regions position themselves autonomously according to their chromatin class
Source: HighWire-hosted journal article supplement (doi:10.1101/gr.213751.116), 2017-03-24

**Supplemental\_Figure\_S8. Heat map of 4C-seq correlation coefficient matrix in *trans*.**

Heat map of Spearman's rank correlation coefficients of the human HAC regions and the orthologous mouse regions in *trans*. The colors range from anti-correlating (-0.4) blue to correlating red (0.4). mHOR1 and mHOR2 are endogenous mouse regions in A9 cells carrying either L-HAC or C-HAC, respectively.

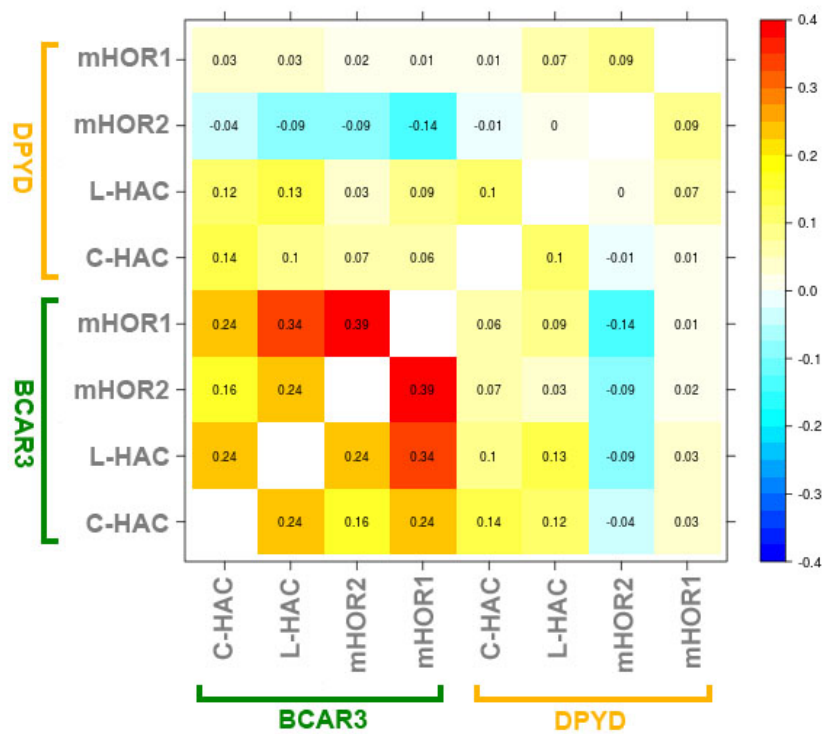

Supplement: Supplemental_Fig_S8.pdf [file Supplemental_Fig_S8.pdf]
