# Supplementary material for: Small chromosomal regions position themselves autonomously according to their chromatin class
Source: HighWire-hosted journal article supplement (doi:10.1101/gr.213751.116), 2017-03-24

**Supplemental\_Figure\_S9. Spatial position of endogenous gene desert (LAD) of hHOR and mHOR in comparison to gene desert of L-HAC.**

Gene deserts were detected by 3D-FISH in human (HFb) and mouse fibroblasts (A9) with respective BAC probes (see Table S1).

**A**, scoring of FISH signals in various nuclear locations in confocal stacks.

**B**, single confocal sections showing nuclei with typical signal localization in mouse (two left panels) and human (right panel) cells. Nuclear periphery, *np*; periphery of chromocenters, *cc*; periphery of nucleoli, *ncl*; nuclear interior, *ni*.

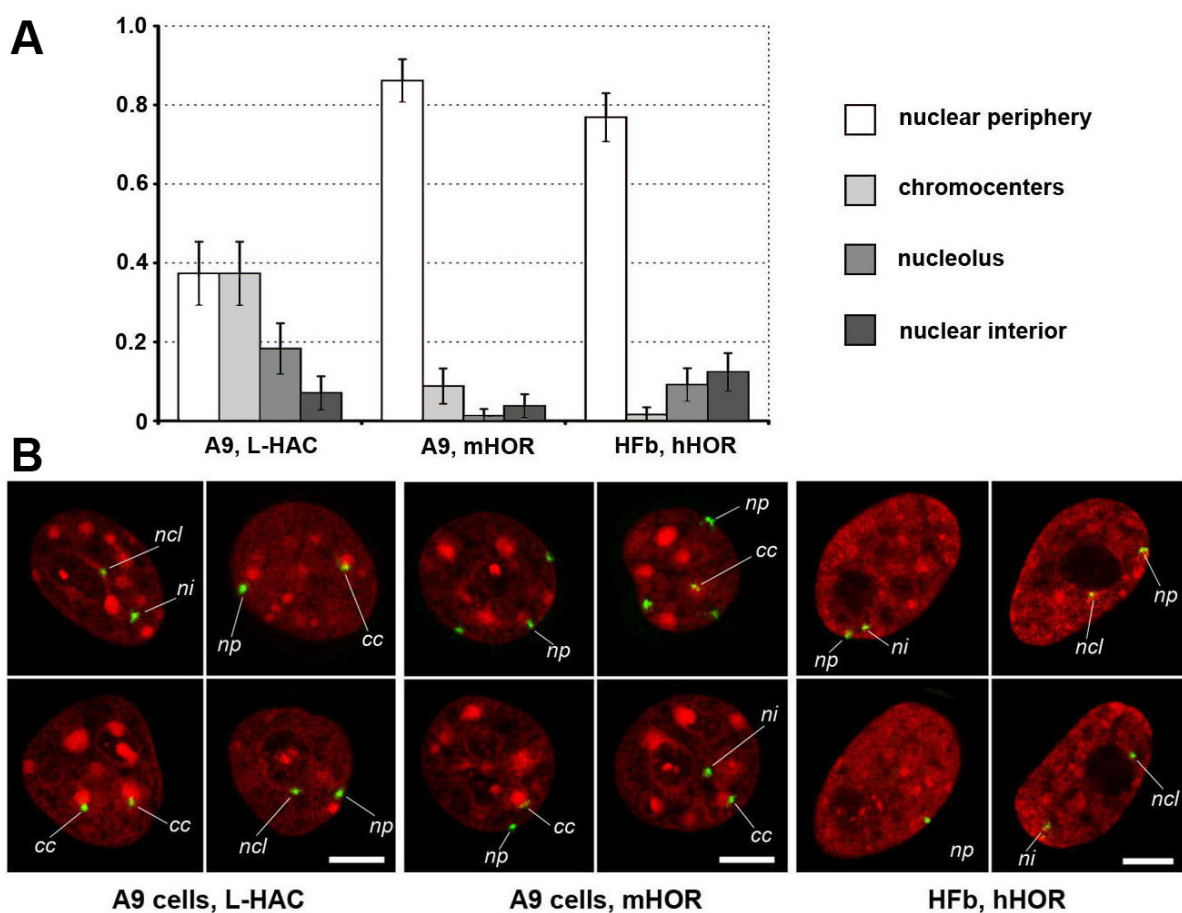

Supplement: Supplemental_Fig_S9.pdf [file Supplemental_Fig_S9.pdf]
