# Supplementary material for: Small chromosomal regions position themselves autonomously according to their chromatin class
Source: HighWire-hosted journal article supplement (doi:10.1101/gr.213751.116), 2017-03-24

### Supplemental\_Figure\_S11. 4C-seq quality plot of experiments analyzed in this study.

Scatter plot shows percentage covered non-blind 4C-seq fragment-ends within 1 Mb of the viewpoint versus the percentage of reads captured in *cis*. High-quality 4C experiment are located in the (B) area (van de Werken et al., 2012a). *M*, million uniquely mapped reads.

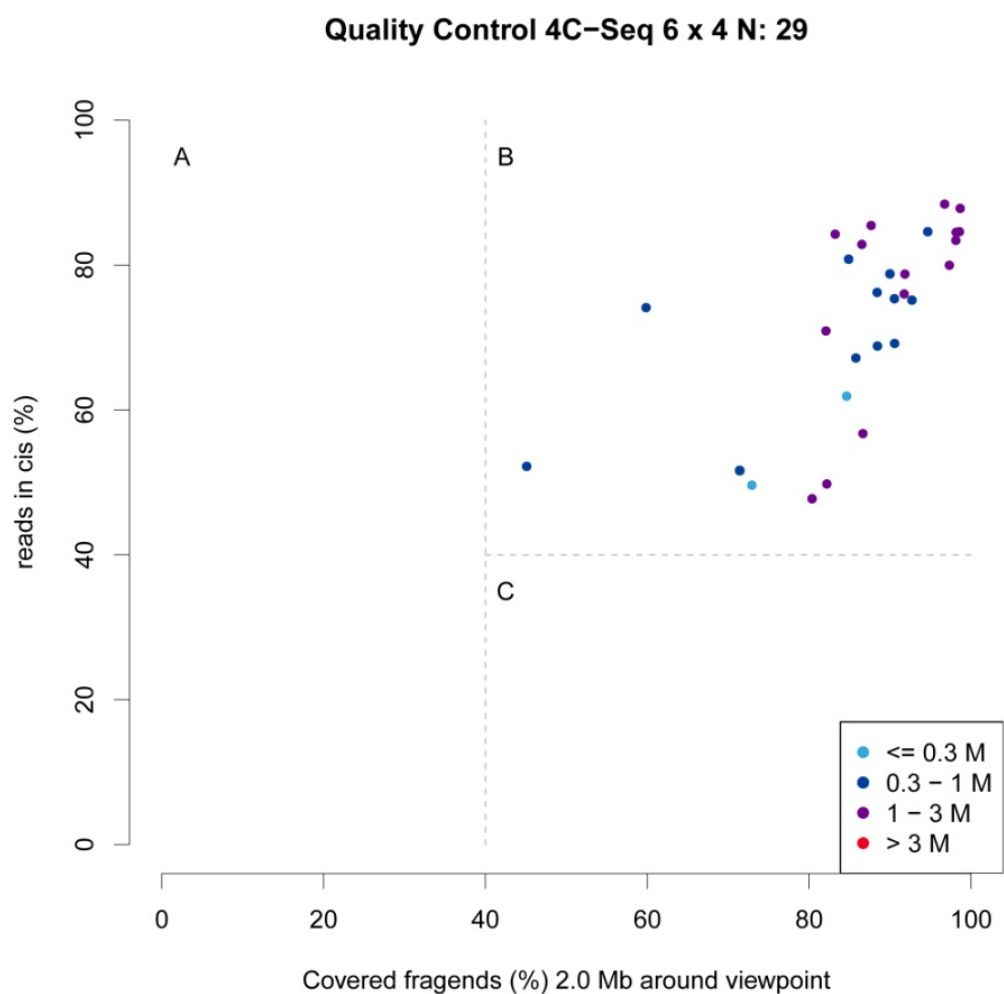

Supplement: Supplemental_Fig_S11.pdf [file Supplemental_Fig_S11.pdf]
