# Supplementary material for: Small chromosomal regions position themselves autonomously according to their chromatin class
Source: HighWire-hosted journal article supplement (doi:10.1101/gr.213751.116), 2017-03-24
Supplement: Supplemental_Table_S2.xlsx [file Supplemental_Table_S2.xlsx]

## Sheet: Sheet1
HAC	Block name	Start	End	Length	Start reason	End reason	Start copy number changeC-HAC	Start copy number change L-HAC	copy number C-HAC	copy number L-HAC
CHAC + LHAC	A	93583533	94202100	618567	translocation alpha-satellite (CHAC+LHAC)	start tandem duplication1 (LHAC)			1	1
LHAC	B	94202100	94480483	278383	start tandem duplication1 (LHAC)	start deletion1 (LHAC)	no	yes	1	2
LHAC	C	94480483	94596436	115953	start deletion1 (LHAC)	start tandem duplication2 (LHAC)	no	yes	1	1
LHAC	D	94596436	94785787	189351	start tandem duplication2 (LHAC)	start deletion2 (LHAC)	no	yes	1	2
LHAC	E	94785787	95106472	320685	start deletion2 (LHAC)	start inversion1 (LHAC)	no	yes	1	1
LHAC	F	95106472	95275403	168931	start inversion1 (LHAC)	end deletion1 (LHAC)	no	yes	1	0
LHAC	G	95275403	95545560	270157	end deletion1 (LHAC)	start deletion3 (LHAC)	no	yes	1	1
LHAC	H	95545560	95554668	9108	start deletion3 (LHAC)	start tandem duplication3 (CHAC+LHAC)	no	yes	1	0
CHAC + LHAC	I	95554668	95592248	37580	start tandem duplication3 (CHAC+LHAC)	end tandem duplication1 (LHAC)	yes	yes	2	2
LHAC	J	95592248	95944272	352024	end tandem duplication1 (LHAC)	start tandem duplication4 (LHAC)	no	yes	2	1
LHAC	K	95944272	95946879	2607	start tandem duplication4 (LHAC)	end inversion1 (LHAC)	no	yes	2	2
LHAC	L	95946879	96073862	126983	end inversion1 (LHAC)	end deletion3 (LHAC)	no	yes	2	1
LHAC	M	96073862	96079200	5338	end deletion3 (LHAC)	end tandem duplication2 (LHAC)	no	yes	2	2
LHAC	N	96079200	96426551	347351	end tandem duplication2 (LHAC)	end deletion2 (LHAC)	no	yes	2	1
LHAC	O	96426551	96435561	9010	end deletion2 (LHAC)	end tandem duplication4 (LHAC)	no	yes	2	2
LHAC	P	96435561	96501381	65820	end tandem duplication4 (LHAC)	translocation to Neo-loxP-3HPRT1 (CHAC+LHAC)	no	yes	2	1
CHAC + LHAC	Q	96501381	96611120	109739	translocation to Neo-loxP-3HPRT1 (CHAC+LHAC)	end tandem duplication3 (CHAC+LHAC)	yes	yes	3	3
CHAC + LHAC	R	96611120	96677566	66446	end tandem duplication3 (CHAC+LHAC)	start inversion2 (LHAC)	yes	yes	2	1
LHAC	S	96677566	96746259	68693	start inversion2 (LHAC)	start deletion4 (CHAC+LHAC)	no	yes	2	2
CHAC + LHAC	T	96746259	96836279	90020	start deletion4 (CHAC+LHAC)	start tandem duplication5 (LHAC)	yes	yes	1	1
LHAC	U	96836279	96886041	49762	start tandem duplication5 (LHAC)	end inversion2 (LHAC)	no	yes	1	2
LHAC	V	96886041	96894068	8027	end inversion2 (LHAC)	end tandem duplication5 (LHAC)	no	no	1	2
LHAC	W	96894068	96917158	23090	end tandem duplication5 (LHAC)	translocation alpha-satellite (LHAC)	no	no	1	2
LHAC	X	96917158	96979887	62729	translocation alpha-satellite (LHAC)	0 coverage (LHAC)	no	yes	1	1
LHAC	Y	96979887	97027447	47560	0 coverage (LHAC)	end deletion4 (CHAC+LHAC)	no	yes	1	0
CHAC + LHAC	Z	97027447	97037518	10071	end deletion4 (CHAC+LHAC)	translocation to Neo-loxP-3HPRT1(CHAC)	yes	yes	2	1
CHAC	a	97037518	97778466	740948	translocation to Neo-loxP-3HPRT1(CHAC)	0 coverage (LHAC)	yes	no	1	1
LHAC	b	97778466	97845521	67055	0 coverage (LHAC)	translocation alpha-satellite (CHAC)	no	yes	1	0
structural variants
Chromosome	Position	Strand	HAC	Structural variant
human_chr1	93583533	-	CHAC + LHAC	translocation to Alpha_Satellite_centr
human_chr1	94202100	-	LHAC	start tandem duplication1
human_chr1	95592248	+	LHAC	end tandem duplication1
human_chr1	94480483	+	LHAC	start deletion1
human_chr1	95275403	-	LHAC	end deletion1
human_chr1	94596436	-	LHAC	start tandem duplication2
human_chr1	96079200	+	LHAC	end tandem duplication2
human_chr1	94785787	+	LHAC	start deletion2
human_chr1	96426551	-	LHAC	end deletion2
human_chr1	95106472	+	LHAC	inversion1
human_chr1	95946879	+	LHAC	inversion1
human_chr1	95545560	+	LHAC	start deletion3
human_chr1	96073862	-	LHAC	end deletion3
human_chr1	95554668	-	CHAC + LHAC	start tandem duplication3
human_chr1	96611120	+	CHAC + LHAC	end tandem duplication3
human_chr1	95944272	-	LHAC	start tandem duplication4
human_chr1	96435561	+	LHAC	end tandem duplication4
human_chr1	96501381	-	CHAC + LHAC	translocation to Neo-loxP-3HPRT1
human_chr1	96677566	-	LHAC	inversion2
human_chr1	96885798	-	LHAC	inversion2
human_chr1	96746259	+	CHAC + LHAC	start deletion4
human_chr1	97027447	-	CHAC + LHAC	end deletion4
human_chr1	96836279	-	LHAC	start tandem duplication5
human_chr1	96894068	+	LHAC	end tandem duplication5
human_chr1	97037518	+	CHAC	translocation to Neo-loxP-3HPRT1
human_chr1	97842867	+	CHAC	translocation to Alpha_Satellite_centr
human_chr1	96917048	+	LHAC	translocation to Alpha_Satellite_centr
